# Supplementary material for: Diastereoselective formation of a dipalladium(i) complex supported by a bridging tetradentate ligand, and oxidative addition of RS–H across a phosphine-bridged PdI–PdI bondElectronic supplementary information (ESI) available: full synthetic methods and characterisation data for compound 1 and the 2a–2f salts. See http://www.rsc.org/suppdata/cc/b3/b300177f/
Source: Royal Society of Chemistry journal article supplement (doi:10.1039/b300177f), 2003-03-20
Supplement: b300177f.doc [file b300177f.doc]

Supplementary Material for Chemical Communications

This journal is © The Royal Society of Chemistry 2003


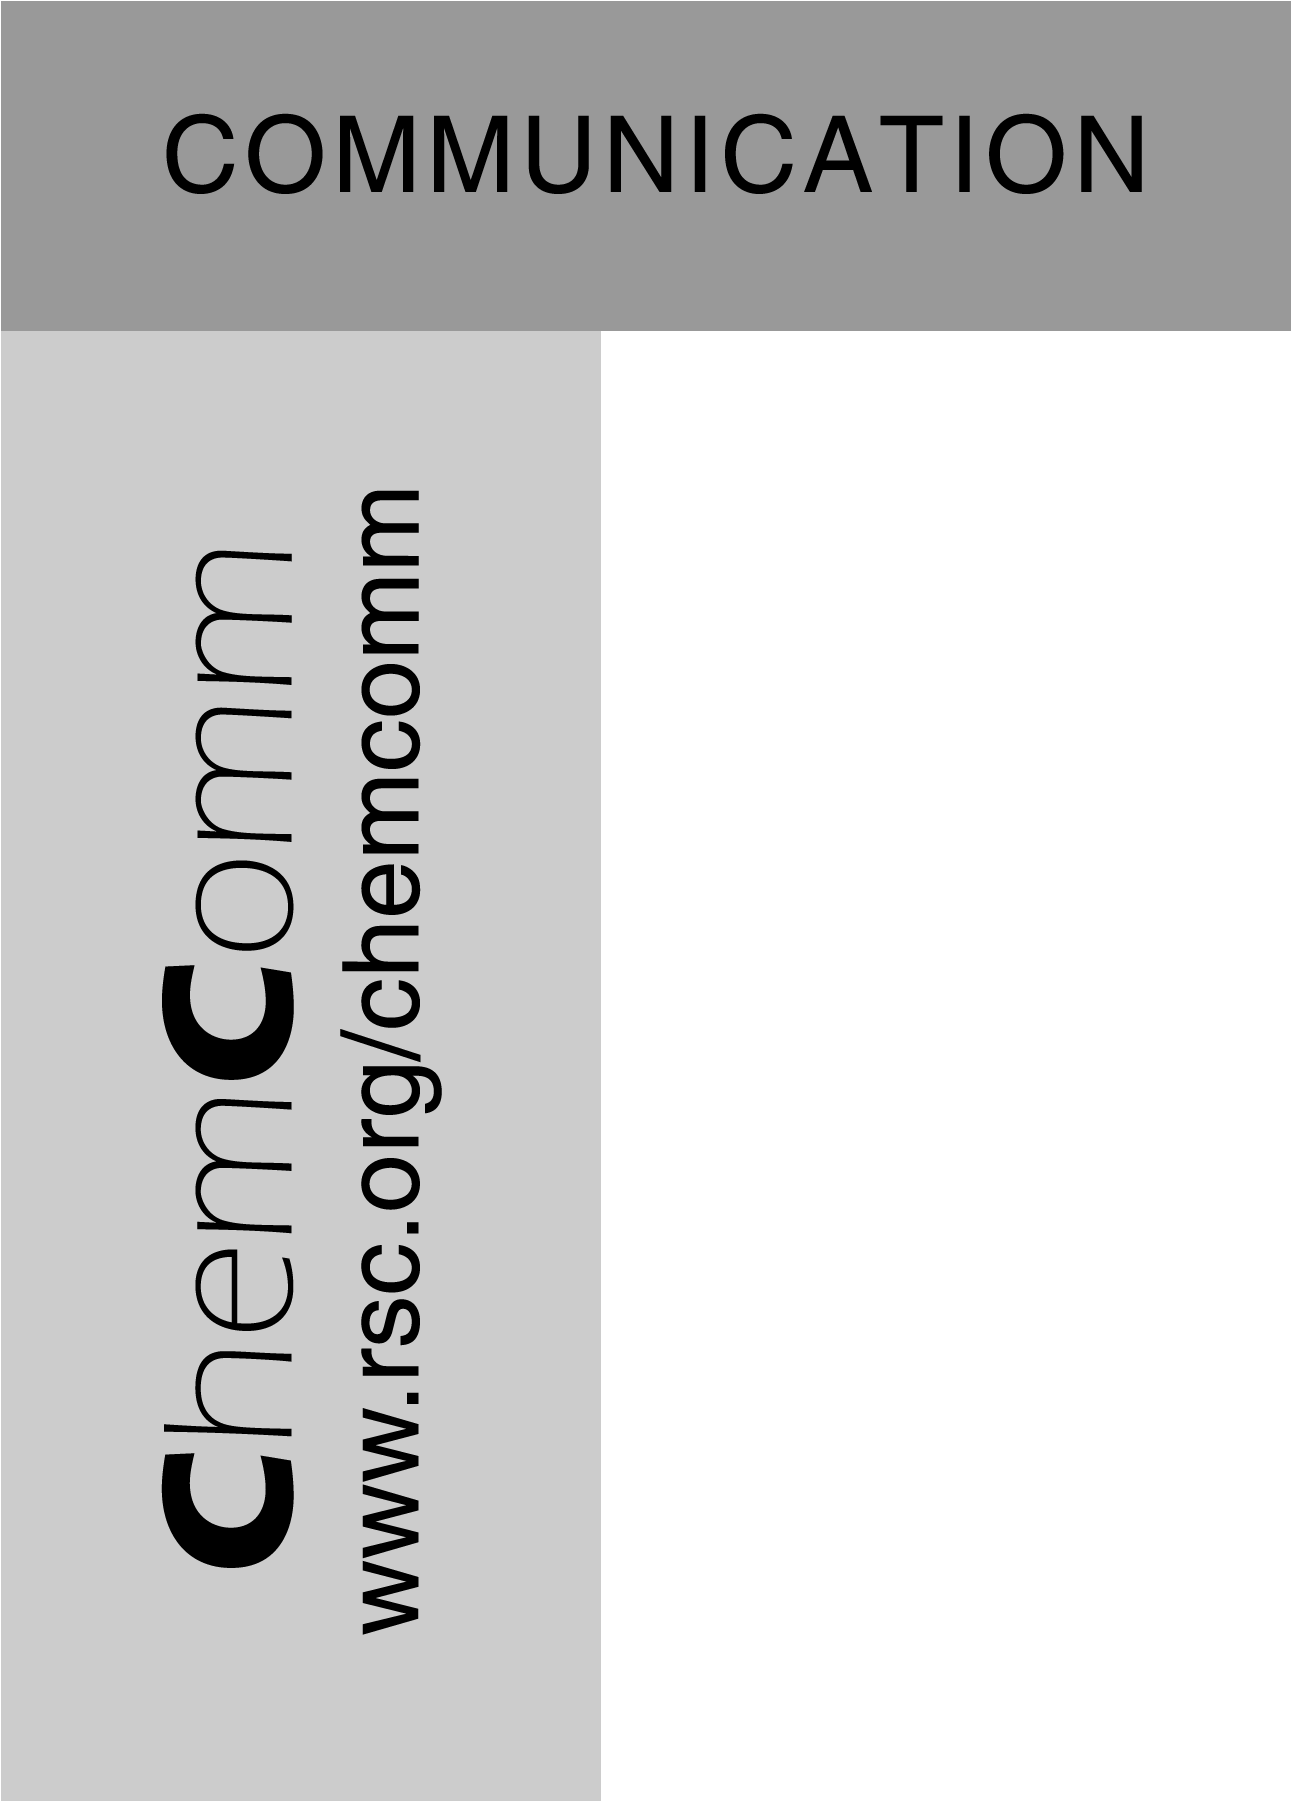
Diastereoselective formation of a dipalladium(I) complex supported by a bridging tetradentate ligand, and oxidative addition of RS–H across a phosphine-bridged PdI–PdI bond

**S. Jo Ling Foo, Nathan D. Jones, Brian O. Patrick and Brian R. James***

Department of Chemistry, University of British Columbia, Vancouver, Canada V6T 1Z1

Fax: 1-604-822-2847; Tel: 1-604-822-6645; E-mail: [brj@chem.ubc.ca](mailto:brj@chem.ubc.ca)

## SUPPLEMENTARY DATA

### 1. Syntheses

*rac***-Pd2Cl2(μ-*N*,*P*,*P*,*N*-dmapm) (***rac***-1).** To a Schlenk tube containing *trans*-PdCl2(PhCN)2 (32 mg, 0.083 mmol) and dmapm (47 mg, 0.084 mmol) was added CH2Cl2 (10 mL), and the resulting yellow solution was stirred at room temperature (r.t., ~20 oC) for 15 min. Pd2(dba)3CHCl3 (44 mg, 0.043 mmol) was then added and the resulting purple solution was refluxed for 3 h during which it became orange. All but 1 mL of solvent was removed *in vacuo*, and Et2O (20 mL) was added to give an orange powder that was collected, washed with Et2O (3  5 mL) and dried under vacuum. Yield: 54 mg (76 %). Anal. Calcd for C33H42N4Cl2P2Pd2: C, 47.2; H, 5.0; N, 6.7. Found: C, 47.5; H, 5.1; N, 6.6. 1H NMR (300 MHz, CDCl3, 300 K) :  2.44 (s, 12H, NC*H*3), 2.89 (s, 6H, NC*H*3), 3.07 (s, 6H, NC*H*3), 3.72 (t, 2H, C*H*2, 2*J*HP = 11.3 Hz), 6.99 (pt, 2H, Ar), 7.22 (m, 6H, Ar), 7.45 (m, 4H, Ar), 7.60 (m, 4H, Ar). 31P{1H} NMR (121 MHz, CDCl3, 300 K):  29.9 (s). Crystals of *rac***-1**∙2 CDCl3 suitable for study by X-ray diffraction were grown by slow evaporation of a CDCl3 solution.

*rac****-*[Pd2Cl2(μ-SR)(μ-*N*,*P*,*P*,*N*-dmapm)][OTf]**

**R = Me (2a+OTf-).** To a CH2Cl2 solution (5 mL) containing *rac*-**1** (50 mg, 0.059 mmol), excess MeSH (by vacuum transfer) and triflic acid (0.003 mL, 0.059 mmol) were added. The solution was stirred for 24 h at r.t. and filtered through a plug of Celite 545 and MgSO4. The volume of the yellow filtrate was reduced *in vacuo* to *~*1 mL and Et2O (20 mL) was added to give the yellow product that was collected, washed with Et2O (3 x 3 mL) and dried *in vacuo*. Yield: 24 mg (40 %). Anal. Calcd. for C35H45N4Cl2F3O3P2Pd2S2: C, 40.6; H, 4.4; N, 5.4. Found: C, 40.8; H, 4.4; N, 5.3 %. 1H NMR (300 MHz, 300 K, CD3OD):  1.9 (s, 3H, C*H*3S), 2.9 (br s, 24 H, NC*H*3), 4.0 (t, 2H, 2*J*HP = 10.4, PC*H*2P), 7.6 (m, 4H, Ar), 7.8 (m, 12H, Ar). 31P{1H} NMR (121 MHz, CD3OD, 300 K):  50.3 (s). 19F{1H} NMR (282 MHz, CD3OD, 300 K):  –3.4 (s). ΛM (CH3CN, 298 K): 116 -1 mol-1 cm2. UV-vis (CH3OH): 372 nm,  = 5,800 M-1 cm-1.

The triflates of the R = Et **(2b+),** *n*Pr **(2c+),** *n*Bu **(2d+),** Bz **(2e+)** andPh **(2f+)** cations were made in exactly the same manner as for the R = Me **(2a+)** compound, but using a 10-fold excess of the appropriate thiol.

**R = Et (2b+OTf-).** Yield68 % of a yellow powder. Anal. Calcd. for C36H47N4Cl2F3O3P2Pd2S2: C, 41.2; H, 4.5; N, 5.3. Found: C, 40.9; H, 4.5; N, 5.2 %. 1H NMR (300 MHz, 300 K, CD3OD):  1.1 (t, 3H, 3*J*HH = 7.3, C*H*3CH2S), 2.6 (q, 2H, 3*J*HH = 7.3, CH3C*H*2S), 2.9 (br s, 24H, NC*H*3), 7.5 (m, 4H, Ar), 7.8 (m, 12H, Ar). 31P{1H} NMR (121 MHz, CD3OD, 300 K):  48.9 (s). 19F{1H} NMR (282 MHz, CD3OD, 300 K) δ –3.5 (s). ΛM (CH3CN, 298 K): 112 -1 mol-1 cm2. UV-vis (CH3OH): 370 nm,  = 5,520 M-1 cm-1.

**R = *n*Pr (2c+OTf-).** Yield 68 % of a pale green powder. Anal. Calcd for C37H49N4Cl2F3O3P2Pd2S2: C, 41.7; H, 4.6; N, 5.3. Found: C, 41.5; H, 4.6; N, 5.1. 1H NMR (300 MHz, CD3OD, 300 K):  0.7 (t, 3H, 3*J*HH = 7.3, C*H3*CH2CH2S), 1.6 (m, 2H, CH3C*H2*CH2S), 2.5 (t, 2H, 3*J*HH = 7.3, CH3CH2C*H2*S), 2.9 (br s, 24H, NC*H3*), 4.0 (t, 2H, 2*J*HP = 10.1, PC*H2*P), 7.5 (m, 4H, Ar), 7.8 (m, 12H, Ar). 31P{1H} NMR (121 MHz, CD3OD, 300 K):  49.2 (s). 19F{1H} NMR (282 MHz, CD3OD, 300 K):  –3.4 (s). ΛM (CH3CN, 298 K): 114 -1 mol-1 cm2. UV-vis (CH3OH): 372 nm,  = 4,870 M-1 cm-1.

**R = *n*Bu (2d+OTf-).** Yield 68 % of a yellow powder. Anal. Calcd for C38H51N4Cl2F3O3P2Pd2S2: C, 42.3; H, 4.8; N 5.2. Found: C 42.0, H 5.0, N 5.1. 1H NMR (300 MHz, CD3OD, 300 K): δ 0.68 (t, 3H, C*H*3CH2CH2CH2S, 2*J*HH = 7.3), 1.07 (m, 2H, CH3C*H*2CH2CH2S), 1.47 (m, 2H, CH3CH2C*H*2CH2S), 2.45 (t, 2H, CH3CH2CH2C*H*2S), 2.86 (br s, 24 H, NC*H*3), 7.89 (t, 4H, Ar, 2*J*HH = 7.4), 7.77 (m, 12H, Ar). 31P{1H} NMR (121 MHz, CD3OD, 300 K): δ 48.8 (s). 19F{1H} NMR (282 MHz, CD3OD, 300 K): δ –3.4 (s). ΛM (MeOH, 298 K): 63 -1 mol-1 cm2. UV-vis (MeOH, r.t.): 370 nm,  = 6,010 M-1 cm-1.

R = Bz (2e+OTf-). Yield 68 % of a yellow powder. Anal. Calcd. For C40H52N4Cl2F3O3P2Pd2S2: C, 44.3; H, 4.4; N, 5.0. Found: C, 44.5; H, 4.5; N, 5.0. 1H NMR (300 MHz, CDCl3, 300 K): δ 1.90 (br s, 12H, NC*H*3), 2.90 (s, 2H, SC*H*2C6H5), 3.44 (br s, 6H, NC*H*3), 3.67 (br s, 6H, NC*H*3), 4.05 (t, 2H, PC*H*2P, 2*J*PH = 10.0), 6.71 (m, 2H, SCH2-*m*-Ph,), 6.86 (m, 2H, SCH2-*o*-Ph), 7.01 (t, 1H, SCH2-*p*-Ph), 7.408.30 (m, 16H, Ar). 31P{1H} NMR (121 MHz, CD3OD, 300 K): δ 51.4 (s). 19F{1H} NMR (282 MHz, CD3OD, 300 K): δ –3.4 (s).

**R = Ph (2f+OTf-).** Yield 50 % of a yellow powder. Anal. Calcd. for C40H47N4Cl2F3O3Pd2P2S2: C, 43.7; H, 4.3; N, 5.1. Found: C, 43.5; H, 4.4; N, 5.2. 1H NMR (300 MHz, 300 K, CD3OD):  2.0 (br s, 12H, NC*H*3), 3.5 (br s, 12H, NC*H*3), 4.0 (t, PC*H*2P, 2*J*HP =10.3), 6.7 (m, 2H, *m*-C6H5S), 6.9 (m, 2H, *o*-C6H5S), 7.0 (m, 1H, *p*-C6H5S), 7.38.4 (br, 16H, Ar). 31P{1H} NMR (121 MHz, CD3OD, 300 K):  51.4 (s). 19F{1H} NMR (282 MHz, CD3OD, 300 K):  –3.4 (s). ΛM (CH3CN, 298 K): 116 -1 mol-1 cm2. UV-vis (CH3OH): 388 nm,  = 6,800 M-1 cm-1.

*rac****-*[Pd2Cl2(μ-SR)(μ-*N*,*P*,*P*,*N*-dmapm)][Cl]**

**R = Et (2b+Cl-).** This compound was made in the same manner as **2b+OTf-** except that triflic acid was not added. Yield 33 % of a yellow powder. Anal. Calcd. For C35H47N4Cl3P2Pd2S: C, 44.9; H, 5.1; N, 6.0. Found: C, 45.2; H, 5.1; N, 5.9. 1H NMR (300 MHz, CDCl3, 300 K): δ 1.14 (s, 3H, C*H*3CH2S), 2.66 (s, 2H, CH3C*H*2S), 2.89 (br s, 24 H, NC*H*3), 4.76 (t, 2H, PC*H*2P, 2*J*PH = 10.8). 7.65 to 8.04 (m, 16H, Ar). 31P{1H} NMR (121 MHz, CDCl3, 300 K): δ 49.0 (s). ΛM (CH3CN, 298 K): 136 -1 mol-1 cm2.

**R = *n*Pr (2c+Cl-).** This compound was made in the same manner as **2c+OTf-** except that triflic acid was not added. Yield 79% of a yellow powder. Anal. Calcd. for C36H49N4Cl3P2Pd2S: C, 45.5; H, 5.2; N, 5.9. Found: C, 45.3; H, 5.4; N, 5.4. 1H NMR (300 MHz, CDCl3, 300 K): ****0.7 (t, 3H, C*H3*CH2CH2S, 3*J*HH = 7.3), 1.6 (m, 2H, CH3C*H2*CH2S), 2.7 (t, 2H, CH3CH2C*H2*S), 3.0 (br s, 12 H, NC*H3*), 4.7 (t, 2H PC*H2*P), 7.4****8.1 (br m, 16 H, Ar). 31P{1H} NMR (121 MHz, CDCl3, 300 K): δ 49.3 (s). ΛM (CH3CN): 98 -1 mol-1 cm2. Crystals of **2c+Cl-**∙H2O suitable for X-ray analysis were isolated from a CH2Cl2 solution of the complex layered with Et2O.

### 2. Crystallographic data

**Table 1.** Selected bond distances (Å) and angles (o) for **1·**2 CDCl3

| Pd(1)—Pd(2) | 2.527(1) | Pd(1)—Cl(1) | 2.384(4) |
| --- | --- | --- | --- |
| Pd(1)—P(1) | 2.153(4) | Pd(1)—N(1) | 2.23(1) |
| Pd(2)—Cl(2) | 2.364(3) | Pd(2)—Cl(2) | 2.184(3) |
| Pd(2)—N(3) | 2.26(1) | P(1)—Pd(1)—N(1) | 85.8(3) |
| N(1)—Pd(1)—Pd(2) | 164.4(3) | P(2)—Pd(2)—N(3) | 86.3(3) |
| N(3)—Pd(2)—Pd(1) | 165.5(3) | P(1)—Pd(1)—Pd(2) | 78.7(1) |
| P(2)—Pd(2)—Pd(1) | 86.99(9) | Cl(1)—Pd(1)—Pd(2) | 98.86(9) |
| Cl(2)—Pd(2)—Pd(1) | 92.12(9) | P(1)—C(17)—P(2) | 102.9(6) |

**Table 2.** Selected bond distances (Å) and angles (o) for **2c+Cl-**∙H2O.

| Pd(1)S(1) | 2.3030(10) | Pd(2)S(1) | 2.3150(10) |
| --- | --- | --- | --- |
| Pd(1)P(1) | 2.1925(8) | Pd(2)P(2) | 2.2011(7) |
| Pd(1)Cl(1) | 2.3545(8) | Pd(2)Cl(2) | 2.3840(7) |
| Pd(1)N(1) | 2.161(2) | Pd(2)N(3) | 2.154(3) |
| S(1)C(34) | 1.830(4) | P(1)C(17) | 1.835(3) |
| P(2)C(17) | 1.840(3) |  |  |
| Pd(1)S(1)Pd(2) | 118.76(5) | P(1)C(17)P(2) | 112.89(14) |
| P(1)Pd(1)N(1) | 85.16(7) | P(2)Pd(2)N(3) | 85.57(7) |
| P(1)Pd(1)S(1) | 86.45(3) | P(2)Pd(2)S(1) | 94.57(4) |
| P(1)Pd(1)Cl(1) | 174.86(3) | P(2)Pd(2)Cl(2) | 176.73(3) |
| N(3)Pd(2)S(1) | 176.67(8) | N(1)Pd(2)S(1) | 164.86(8) |
